# Supplementary material for: Variations in hospital resource use across stroke care teams in England, Wales and Northern Ireland: a retrospective observational study
Source: PubMed Central journal article supplement (PMC6756417; doi:10.1136/bmjopen-2019-030426), 2019-09-20
Supplement: bmjopen-2019-030426supp001.pdf [file bmjopen-2019-030426supp001.pdf]

**Table S1. Results Stage 1: Negative binomial models for length of stay per team category**

|                                                          | HASUs<br>(1) | RATs<br>(2) | NRATs<br>(3) | NAITs<br>(4) |
|----------------------------------------------------------|--------------|-------------|--------------|--------------|
| <i>Age group, ref. value: 80-89</i>                      |              |             |              |              |
| age_lessthan50                                           | 1.034        | 0.693***    | 0.838***     | 0.900**      |
|                                                          | 0.027        | 0.012       | 0.035        | 0.047        |
| age_50_59                                                | 0.989        | 0.706***    | 0.894***     | 0.892***     |
|                                                          | 0.021        | 0.010       | 0.030        | 0.031        |
| age_60_69                                                | 1.031        | 0.770***    | 0.943**      | 0.961        |
|                                                          | 0.019        | 0.008       | 0.026        | 0.025        |
| age_70_79                                                | 0.998        | 0.890***    | 0.961*       | 0.950***     |
|                                                          | 0.015        | 0.007       | 0.020        | 0.019        |
| age_90_99                                                | 0.996        | 1.022**     | 0.950*       | 0.924***     |
|                                                          | 0.021        | 0.010       | 0.025        | 0.023        |
| age_100 or more                                          | 0.952        | 0.901**     | 0.712***     | 0.784        |
|                                                          | 0.062        | 0.046       | 0.075        | 0.178        |
| male                                                     | 1.003        | 0.967***    | 1.027        | 0.981        |
|                                                          | 0.012        | 0.006       | 0.017        | 0.015        |
| <i>Ethnicity ref. value: white</i>                       |              |             |              |              |
| Asian                                                    | 0.965*       | 0.993       | 1.007        | 0.964        |
|                                                          | 0.020        | 0.025       | 0.030        | 0.054        |
| black                                                    | 0.993        | 1.094*      | 1.116***     | 1.112        |
|                                                          | 0.023        | 0.052       | 0.042        | 0.091        |
| mixed                                                    | 1.109        | 1.114       | 1.091        | 1.148        |
|                                                          | 0.074        | 0.078       | 0.086        | 0.166        |
| not known                                                | 0.993        | 0.980       | 0.987        | 0.998        |
|                                                          | 0.019        | 0.016       | 0.026        | 0.036        |
| other                                                    | 1.006        | 1.038       | 0.987        | 1.051        |
|                                                          | 0.021        | 0.050       | 0.036        | 0.069        |
| <i>Social deprivation ref. value: 1: low deprivation</i> |              |             |              |              |
| moderate deprivation                                     | 1.019        | 0.991       | 0.987        | 0.996        |
|                                                          | 0.015        | 0.010       | 0.022        | 0.025        |
| high deprivation                                         | 0.966**      | 0.969***    | 1.029        | 0.989        |
|                                                          | 0.017        | 0.010       | 0.027        | 0.025        |

|                                                            |          |          |          |          |
|------------------------------------------------------------|----------|----------|----------|----------|
| very high deprivation                                      | 0.964**  | 0.960*** | 1.030    | 1.003    |
|                                                            | 0.018    | 0.010    | 0.029    | 0.027    |
| deprivation not known                                      | 1.033    | 0.948**  | 0.989    | 0.854**  |
|                                                            | 0.035    | 0.023    | 0.051    | 0.057    |
| <i>Stroke related co-morbidities</i>                       |          |          |          |          |
| heart failure                                              | 1.041*   | 1.007    | 0.967    | 0.973    |
|                                                            | 0.024    | 0.013    | 0.030    | 0.034    |
| hypertension                                               | 1.008    | 1.003    | 1.009    | 1.017    |
|                                                            | 0.012    | 0.006    | 0.017    | 0.016    |
| atrial fibrillation                                        | 0.997    | 1.035*** | 1.037*   | 1.007    |
|                                                            | 0.016    | 0.008    | 0.021    | 0.019    |
| diabetes                                                   | 1.006    | 1.048*** | 0.999    | 1.015    |
|                                                            | 0.014    | 0.008    | 0.019    | 0.021    |
| previous stroke                                            | 0.985    | 0.977*** | 0.977    | 1.011    |
|                                                            | 0.013    | 0.007    | 0.018    | 0.018    |
| <i>Previous mRS score, ref. group: mRS=2</i>               |          |          |          |          |
| previous MRS = 0 or previous MRS= 1                        | .        | .        | 1.012    | 1.096*   |
|                                                            | .        | .        | 0.043    | 0.052    |
| previous MRS = 3                                           | .        | .        | 1.145*** | 1.121*** |
|                                                            | .        | .        | 0.038    | 0.040    |
| previous MRS = 4                                           | .        | .        | 1.467*** | 1.337*** |
|                                                            | .        | .        | 0.047    | 0.043    |
| previous MRS = 5                                           | .        | .        | 1.655*** | 1.620*** |
|                                                            | .        | .        | 0.061    | 0.059    |
| <i>Severity of stroke, ref. group: mild (NIHSS &lt; 5)</i> |          |          |          |          |
| moderate (NIHSS 5-14)                                      | 1.132*** | 1.533*** | 1.206*** | 1.184*** |
|                                                            | 0.015    | 0.012    | 0.026    | 0.024    |
| severe (NIHSS 15-20)                                       | 1.189*** | 1.823*** | 1.402*** | 1.276*** |
|                                                            | 0.026    | 0.021    | 0.041    | 0.033    |
| very severe (NIHSS > 20)                                   | 1.221*** | 1.838*** | 1.427*** | 1.292*** |
|                                                            | 0.029    | 0.022    | 0.047    | 0.037    |
| intracerebral haemorrhage                                  | 1.081*** | 1.195*** | 1.098*** | 1.032    |
|                                                            | 0.022    | 0.012    | 0.025    | 0.022    |

*Need for therapy*

|                                               |          |          |          |          |
|-----------------------------------------------|----------|----------|----------|----------|
| need for occupational therapy (n_OT)          | 1.779*** | 2.306*** | 2.083*** | 1.695*** |
|                                               | 0.040    | 0.029    | 0.078    | 0.114    |
| need for physiotherapy (n_PT)                 | 1.762*** | 1.754*** | 1.720*** | 1.691*** |
|                                               | 0.046    | 0.025    | 0.075    | 0.115    |
| need for speech and language therapy (n_SALT) | 1.456*** | 2.121*** | 1.778*** | 1.336*** |
|                                               | 0.025    | 0.019    | 0.040    | 0.026    |
| need for psychological therapy (n_PSY)        | 1.613*** | 2.315*** | 1.920*** | 1.395*** |
|                                               | 0.066    | 0.038    | 0.049    | 0.037    |

*Amount of therapy*

|                                     |          |          |          |          |
|-------------------------------------|----------|----------|----------|----------|
| n_OT x OT average daily minutes     | 0.985*** | 0.977*** | 0.986*** | 0.986*** |
|                                     | 0.000    | 0.000    | 0.001    | 0.001    |
| n_PT x PT average daily minutes     | 0.988*** | 0.995*** | 0.996*** | 1.001    |
|                                     | 0.001    | 0.000    | 0.001    | 0.001    |
| n_SALT x SALT average daily minutes | 0.986*** | 0.970*** | 0.983*** | 0.994*** |
|                                     | 0.001    | 0.001    | 0.001    | 0.001    |
| n_PSY x PSY average daily minutes   | 0.986*** | 0.951*** | 0.973*** | 0.977*** |
|                                     | 0.002    | 0.004    | 0.003    | 0.006    |

*order of team in patient pathway*

|                          |       |          |          |        |
|--------------------------|-------|----------|----------|--------|
|                          | .     | 1.381*** | 1.057*** | 1.059* |
|                          | .     | 0.027    | 0.020    | 0.032  |
| <i>weekend admission</i> | 1.007 | 1.015**  | 1.029    | 1.008  |
|                          | 0.013 | 0.007    | 0.018    | 0.018  |

*transferred from a HASU to another inpatient stroke unit*

|  |       |       |          |         |
|--|-------|-------|----------|---------|
|  | 1.354 | 0.944 | 0.816*** | 0.758** |
|  | 0.262 | 0.071 | 0.020    | 0.086   |

*Comorbidities*

|                                                |          |          |          |        |
|------------------------------------------------|----------|----------|----------|--------|
| patient treated for an urinary tract infection | 1.122*** | 1.356*** | 1.179*** | 1.054* |
|                                                | 0.027    | 0.017    | 0.035    | 0.029  |

*deceased*

|  |          |          |          |          |
|--|----------|----------|----------|----------|
|  | 1.418*** | 0.830*** | 0.810*** | 0.765*** |
|  | 0.049    | 0.009    | 0.024    | 0.044    |

*transferred to another inpatient stroke unit*

|  |          |          |          |          |
|--|----------|----------|----------|----------|
|  | 1.197*** | 1.070*** | 0.661*** | 0.670*** |
|  | 0.017    | 0.011    | 0.016    | 0.031    |

## constant

|  |          |          |          |          |
|--|----------|----------|----------|----------|
|  | 1.828*** | 2.512*** | 4.376*** | 8.768*** |
|  | 0.051    | 0.066    | 0.291    | 0.940    |

---

|                              |          |          |          |          |
|------------------------------|----------|----------|----------|----------|
| N                            | 14,720   | 112,339  | 11,693   | 6,644    |
| alpha (dispersion)           | 0.128*** | 0.582*** | 0.494*** | 0.338*** |
| adj. Deviance R <sup>2</sup> | 0.452    | 0.481    | 0.471    | 0.331    |

---

Exponentiated coefficients (IRR); Standard errors in second row. NB: negative binomial.

Team deviations not shown. \*  $p < 0.10$ , \*\*  $p < 0.05$ , \*\*\*  $p < 0.01$

**Table S2. Stage 2: Linear regression analysis - team effect on team factors**

|                                                           | RATs     | NRATs   |
|-----------------------------------------------------------|----------|---------|
| Stroke admissions (hundreds)                              | 0.000    | -0.019  |
|                                                           | 0.012    | 0.029   |
| Mortality rate <sup>†</sup>                               | 0.011    | 0.034** |
|                                                           | 0.011    | 0.012   |
| Rate of urinary infections <sup>†</sup>                   | 0.014    | 0.005   |
|                                                           | 0.009    | 0.006   |
| Rate of patients discharged as dependants <sup>†,‡</sup>  | -0.007** | -0.003  |
|                                                           | 0.003    | 0.015   |
| Rate of WTE qualified clinical psychologists <sup>†</sup> | -0.404   | -0.314  |
|                                                           | 0.979    | 1.066   |
| Rate of WTE qualified dieticians <sup>†</sup>             | 0.901    | 0.299   |
|                                                           | 0.685    | 2.209   |
| Rate of WTE qualified OT therapists <sup>†</sup>          | -0.319   | 0.140   |
|                                                           | 0.332    | 3.506   |
| Rate of WTE qualified PT therapists <sup>†</sup>          | 0.615    | -0.188  |
|                                                           | 0.374    | 0.954   |
| Rate of WTE qualified SALT therapists <sup>†</sup>        | -0.048   | 0.601   |
|                                                           | 0.636    | 4.097   |
| Rate of WTE registered nurses <sup>†</sup>                | -0.012   | -0.009  |
|                                                           | 0.079    | 0.067   |
| Thrombolysis provided on site                             | -0.292*  | 0.055   |
|                                                           | 0.159    | 0.292   |
| Access to stroke specific ESD                             | -0.098*  | 0.005   |
|                                                           | 0.055    | 0.258   |
| Access to a non-specialist ESD                            | -0.029   | 0.072   |
|                                                           | 0.060    | 0.172   |
| Access to non-specialist community rehabilitation team    | -0.022   | 0.042   |
|                                                           | 0.065    | 0.261   |
| <i>region, ref. group: Yorkshire and the Humber</i>       |          |         |
| Cheshire and Mersey                                       | 0.013    | .       |
|                                                           | 0.102    | .       |
| East Midlands                                             | -0.300   | .       |
|                                                           | 0.194    | .       |
| East of England                                           | -0.003   | .       |
|                                                           | 0.107    | .       |
| Greater MCR, Lancashire, South Cumbria                    | -0.234*  | .       |
|                                                           | 0.134    | .       |
| North of England                                          | -0.082   | .       |
|                                                           | 0.098    | .       |
| Northern Ireland                                          | -0.293   | .       |
|                                                           | 0.312    | .       |
| South East Coast                                          | -0.086   | .       |
|                                                           | 0.099    | .       |
| South West                                                | -0.095   | .       |
|                                                           | 0.101    | .       |
| Thames Valley                                             | -0.156   | .       |

|                         |          |       |
|-------------------------|----------|-------|
|                         | 0.176    | .     |
| Wales                   | -0.235   | .     |
|                         | 0.165    | .     |
| Wessex                  | -0.032   | .     |
|                         | 0.162    | .     |
| West Midlands           | -0.230** | .     |
|                         | 0.108    | .     |
| _cons                   | 1.528*** | 0.964 |
|                         | 0.354    | 1.450 |
| <hr/>                   |          |       |
| N                       | 147      | 32    |
| R <sup>2</sup>          | 0.327    | 0.566 |
| adjusted R <sup>2</sup> | 0.182    | 0.209 |
| <hr/>                   |          |       |

Coefficients; standard errors in second row, \* p<0.10, \*\* p<0.05, \*\*\* p<0.01  
<sup>†</sup>Rate per 100 hospitalisations; <sup>‡</sup>classified as dependant if mRS at final discharge > 2.
